# Supplementary material for: The Cystine/Glutamate Antiporter, System xc–, Contributes to Cortical Infarction After Moderate but Not Severe Focal Cerebral Ischemia in Mice
Source: Frontiers journal article supplement (doi:10.3389/fncel.2022.821036), 2022-05-09
Supplement: Data_Sheet_1.pdf [file Data_Sheet_1.pdf]

**S1. Schema Depicting Timeline of Ischemic Stroke Protocols.** Schema depicting the photothrombosis-induced (PTI) ischemia (A, B) and permanent middle cerebral artery occlusion protocols. Detailed descriptions can be found in materials and methods.

**S2. Measurement of Cerebral Blood Flow using Laser Scanning Contrast Imaging:** Representative single exposure laser speckle contrast imagery of C3H/HeSnJ mouse before and after photochemical induction of stroke (PTI) as described in materials and methods and schematically depicted in S1. Upper panel: real-time tissue blood perfusion graph before and immediately after laser illumination (PTI). Lower panels show region of interest/illumination (ROI), which is encircled. Left panel: LSCI of ROI before and after illumination. Middle panel: bright field image of the chosen ROI. Right panel: depicts the mouse's position and location of the ROI. Video was exported as 4x speed of original recording.
